# Supplementary material for: Synthesis of Ni@SiC/CNFs Composite and Its Microwave Induced Catalytic Activity
Source: Preprints.org preprint supplement (doi:10.20944/preprints202407.0347.v1), 2024-07-04
Supplement: Supplementary file 1 [file supplementary]

Supporting information for

**Synthesis of Ni@SiC/CNFs composite and its Microwave Induced Catalytic Activity**


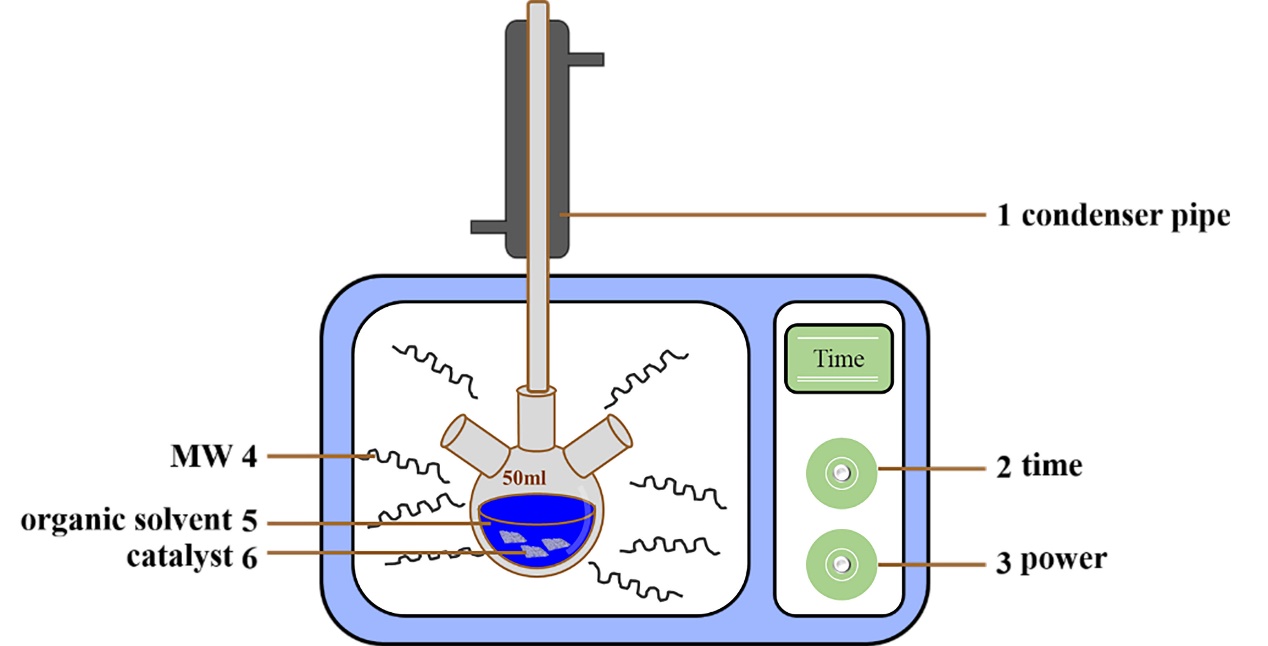


Fig. S1 Diagram of microwave-assisted catalytic reactor


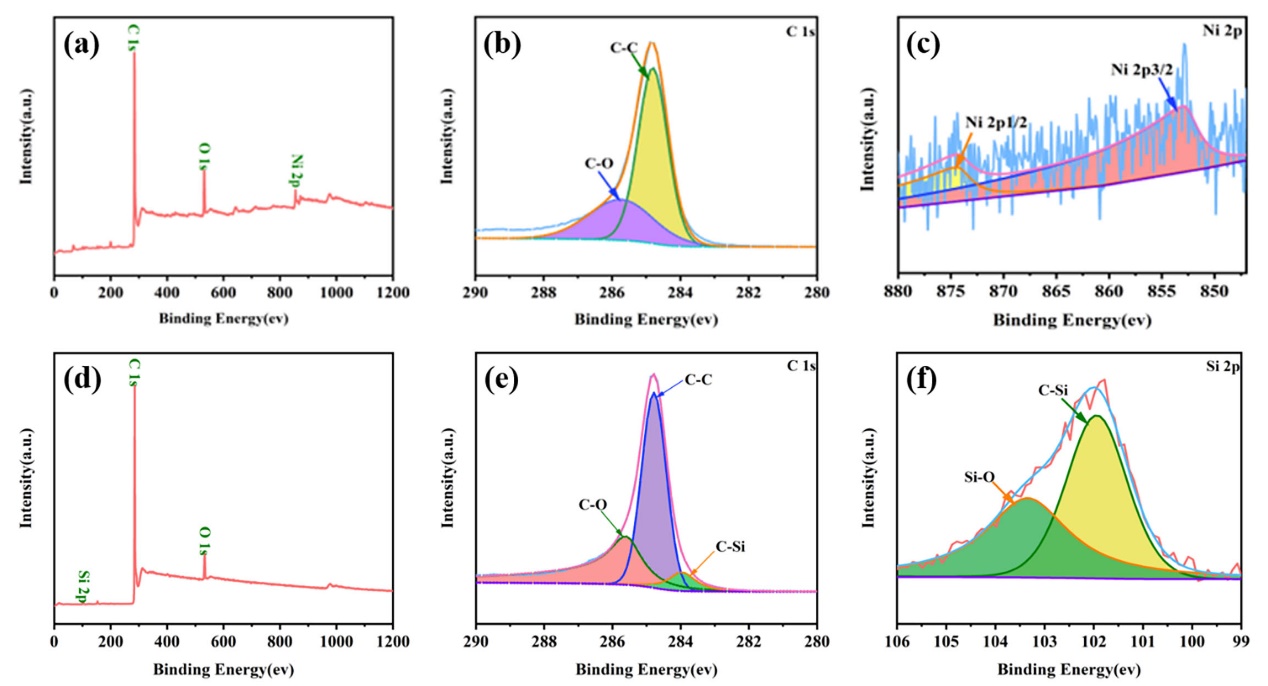


Fig. S2 XPS of the NC and SC composite materials: (a) Full spectrum, (b) C 1s and (c) Ni 2p for the NC composite materials, respectively; (d) Full spectrum, (e) C 1s and (f) Si 2p for the SC composite materials, respectively.


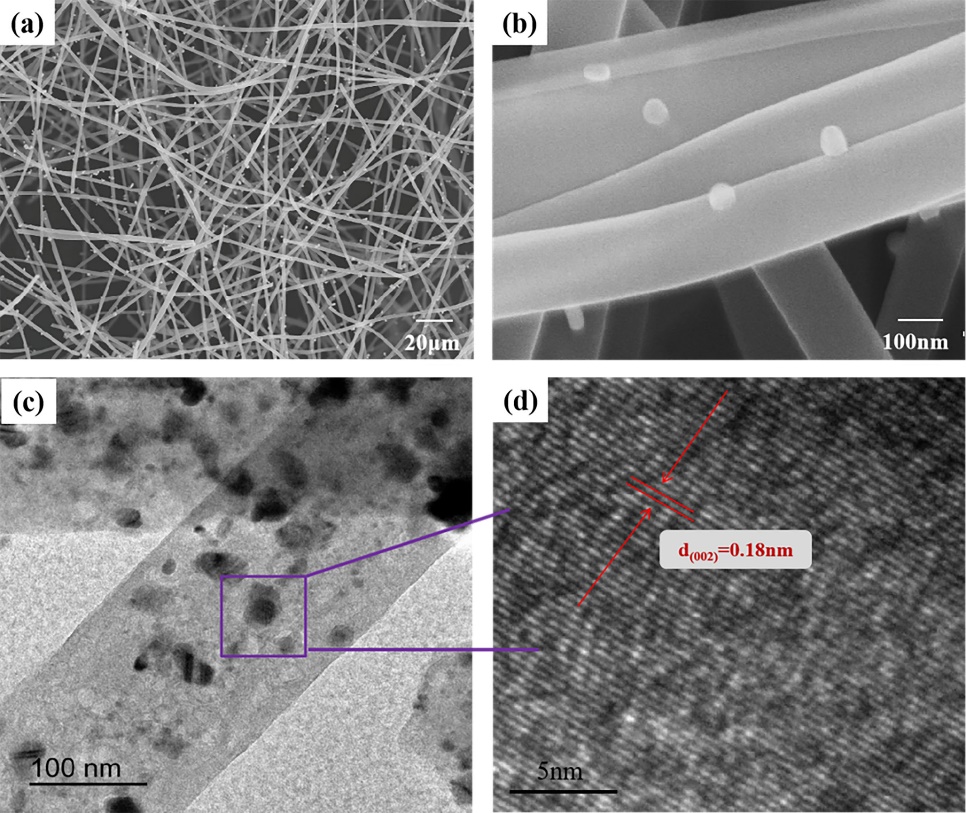


Fig S3 (a-b) SEM images of NC catalyst at different magnifications; (c) TEM images of NC catalyst. (d) HRTEM image.


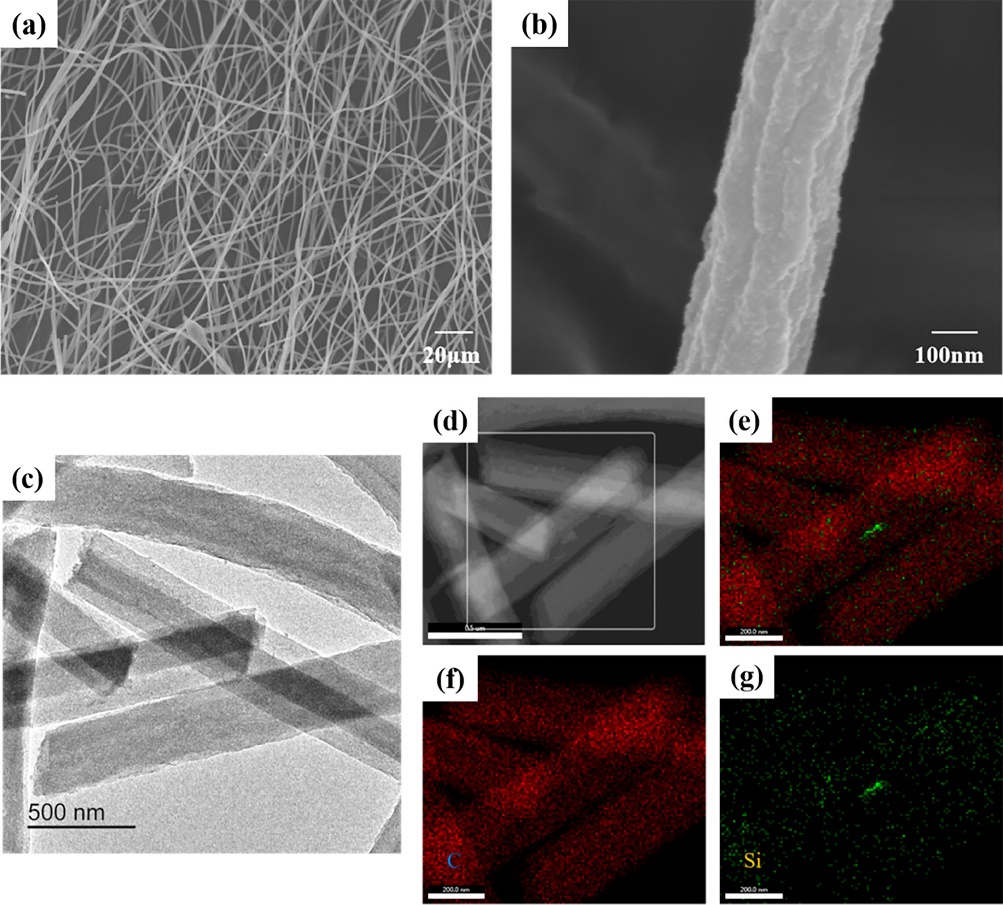


Fig S4 (a-b) SEM images of SC catalyst at different magnifications; (c) TEM images of NSC catalyst. (f) HRTEM image. (d-g) HAADF-STEM image and corresponding elemental mappings of (f) C, (g) SiC.


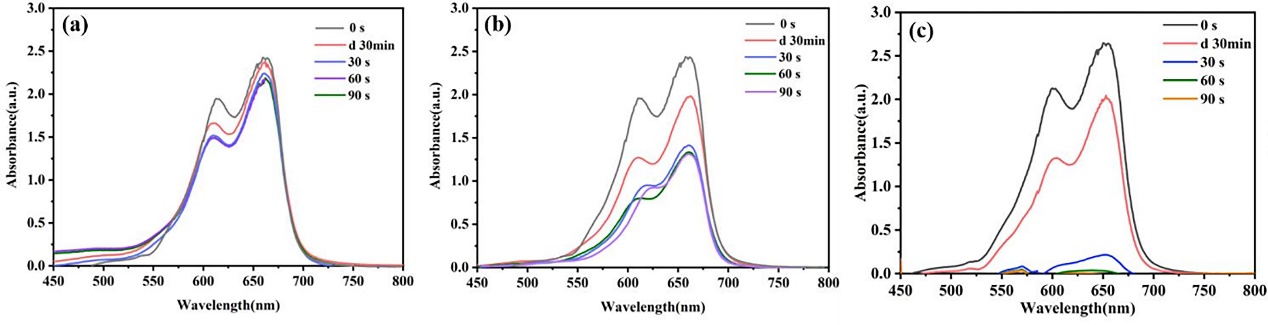


Fig S5 Ultraviolet absorption spectra of MB by different composites: (a) C/Ni, (b) C/SiC, (c) Ni@SiC/CNFs.
